# Supplementary material
Source: MDPI journal article supplement (https://www.mdpi.com/2073-4344/7/3/87)

TOC Graphic: Recent Advancements in Stereoselective Olefin Metathesis Using Ruthenium Catalysts

Manuscript ID: catalysts-179853

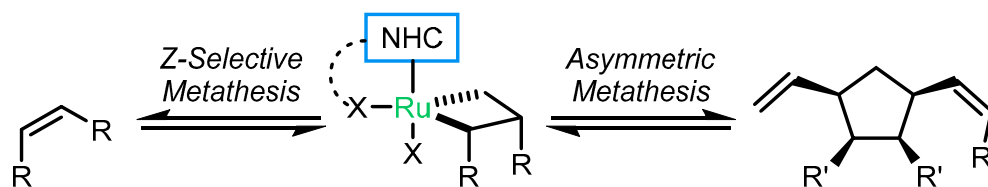

Supplement: s1 [file s1]
